# Supplementary material
Source: ML conference proceedings conference paper supplement (https://openreview.net/forum?id=AUz5Oig77OS)
Supplement: supplementary_material [file attachment]

# Spatially Sparse Inference for Generative Image Editing Supplementary Material

352  
353

## A Additional Implementation Details

354 For all models, we use block size 6 for  $3 \times 3$  convolutions and block size 4 for  $1 \times 1$  convolutions. For  
355 DDIM [1] and Progressive Distillation [12], we pre-compute and reuse the statistics of the original  
356 image for all group normalization layers [84]. For GAN Compression [3], we pre-compute and  
357 reuse the statistics of the original image for all instance normalization layers [82] whose resolution  
358 is higher than  $16 \times 32$ .  
359

## B Kernel Fusion

360

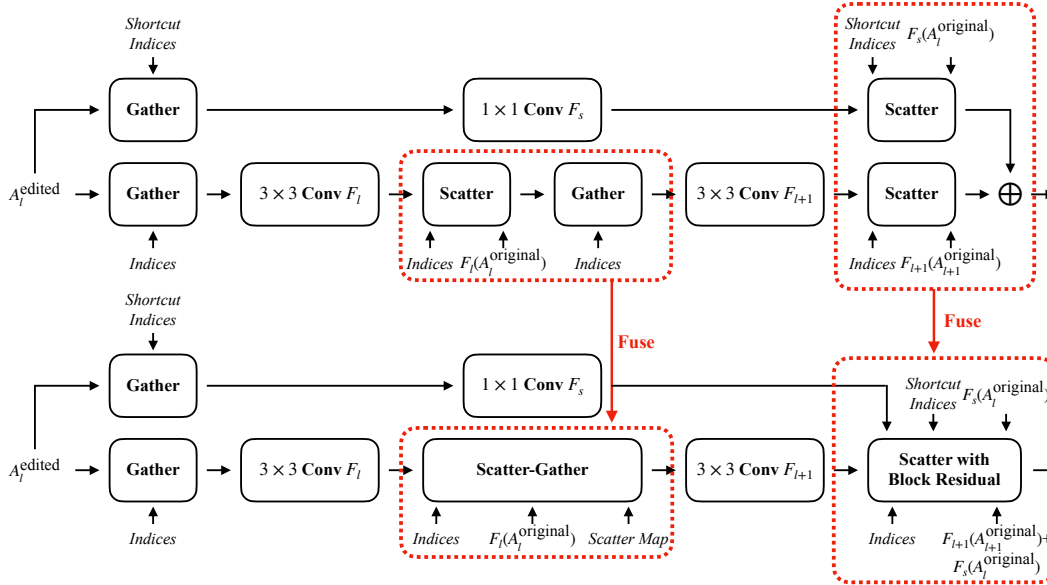

Figure 6: Visualization of kernel fusion in DDIM [1] ResBlock [88]. We omit the element-wise operations for simplicity and follow the notations in Section 3. As the kernel sizes of the convolution in the shortcut branch and main branch are different (*Indices* and *Shortcut Indices*). To reduce the tensor copying overheads in Scatter, we fuse Scatter and the following Gather into Scatter-Gather and fuse the Scatter in the shortcut, main branch and residual addition into Scatter with Block Residual. We pre-compute an additional *Scatter Map* for the Scatter-Gather kernel.

361 As mentioned in Section 3.2, we fuse Scatter and the following Gather into a Scatter-Gather  
362 operator and also fuse Scatter in the shortcut, main branch and residual addition together. The  
363 detailed fusion pattern is shown in Figure 6. For simplicity, we omit the element-wise operations  
364 (e.g., Nonlinearity and Scale+Shift). Below we include more implementation details of each  
365 fusion design.

366 **Scatter-Gather fusion.** When a Scatter is directly followed by a Gather, we could fuse these  
367 two operators into a Scatter-Gather to avoid copying the original activation  $F_l(A_l^{\text{original}})$ . We  
368 pre-built a *Scatter Map* to indicate the index mapping from the  $F_l$  output to the previous Scatter  
369 output, and directly gather the active blocks from the  $F_l$  output and original activation  $F_l(A_l^{\text{original}})$   
370 with it. Note that the pre-computation is cheap and only needs to be once for each resolution.

371 **Shortcut Scatter fusion.** The  $1 \times 1$  convolution in the shortcut branch consumes much less  
372 computation than the convolutions in the main branch, therefore the overheads of Gather and  
373 Scatter weigh more in the shortcut branch. We fuse the Scatter in the shortcut branch and main  
374 branch along with residual addition together into Scatter with Block Residual to reduce these  
375 overheads. Specifically, we first scatter  $F_{l+1}$  output in the pre-computed  $F_{l+1}(A_{l+1}^{\text{original}}) + F_s(A_l^{\text{original}})$

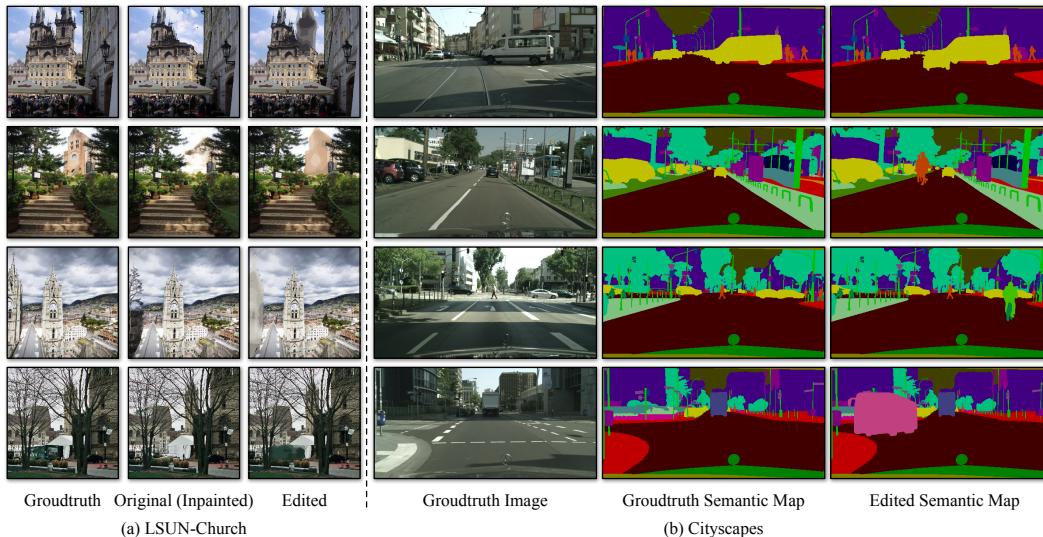

Figure 7: Several examples of our synthetic editing dataset on (a) LSUN Church and (b) Cityscapes. On LSUN Church, we view the inpainted image as the original image and generate the editing by quantizing color at the corresponding regions. On Cityscapes, we generate the editing by pasting some foreground objects to the ground-truth semantic maps.

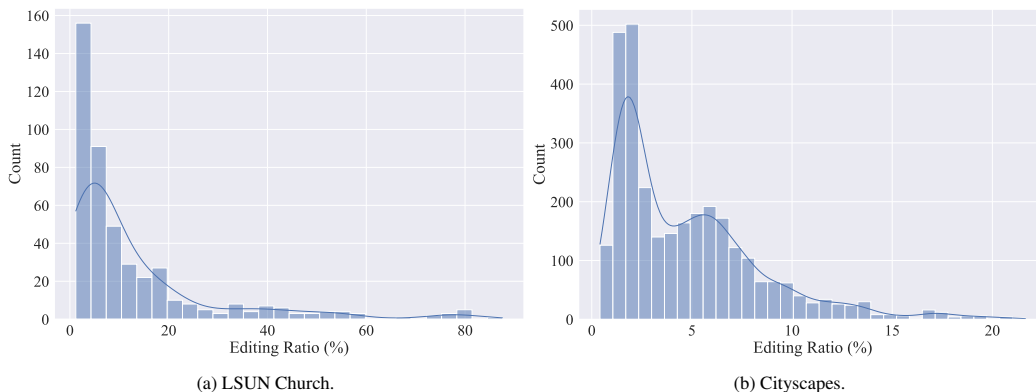

Figure 8: Detailed editing ratio distribution of our synthetic datasets.

376 and add the original residual  $F_s(A_l^{\text{original}})$  only at the scattered locations correspondingly according  
 377 to *Indices*. Then we calibrate the final output with  $F_s$  output by adding the residual difference  
 378  $F_s(A_l^{\text{edited}}) - F_s(A_l^{\text{original}})$  at the scattered locations inplace according to *Shortcut Indices*.

### 379 C Benchmark Datasets

380 We elaborate more details on how we build the synthetic editing dataset.

381 **LSUN Church.** Figure 7(a) shows some examples of our synthetic editing on LSUN Church. The  
 382 average edited area of the whole dataset is 13.1%. The detailed distribution is shown in Figure 8a.

383 **Cityscapes.** We collect 27 foreground object semantic masks from the validation set. The objects  
 384 include 4 bicycles, 1 motorcycle, 7 cars, 6 trucks, 3 buses, 5 persons, and 1 train. Figure 9 shows  
 385 some visualization of the collected semantic masks. We generate the editing by randomly pasting  
 386 one of these objects to the ground-truth semantic maps with augmentation. The augmentation  
 387 includes random horizontal flip, resize (scale factor in  $[0.8, 1.2]$ ), translation  $([-32, 32])$  for height and  
 388  $([-64, 64])$  for width). To make the synthetic editing more reasonable, when the scale factor is larger  
 389 than 1, the height translation can only be positive, otherwise, it can only be negative. Figure 7(b)

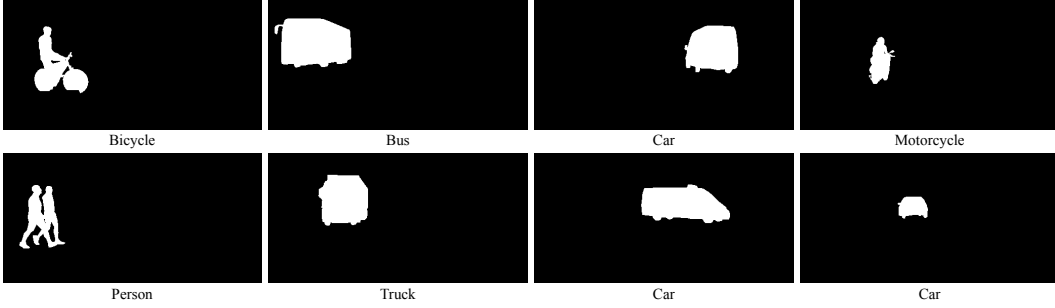

Figure 9: Several examples of our collected foreground object semantic masks.

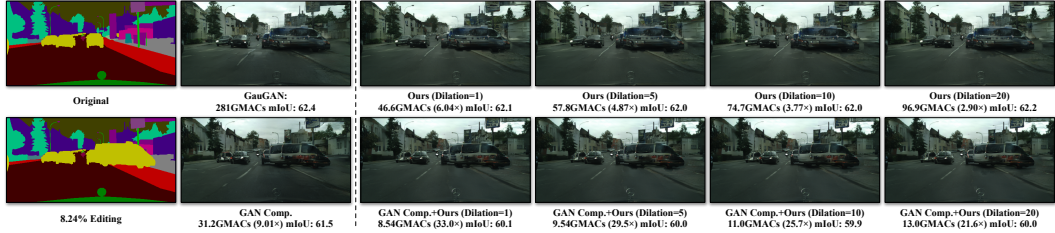

Figure 10: Visualization results of different dilation sizes on GauGAN. Although without mIoU improvement, increasing the dilation could smoothly blend the boundary between the edited region and unedited regions to improve the image quality slightly. Specifically, the shadow boundary of the added car fades when dilation increases. However, it will incur more computations.

390 shows some editing examples. The average editing area of the entire dataset is 4.77%. The detailed  
 391 distribution is shown in Figure 8b.

## 392 D Additional Results

393 **Dilation hyper-parameter.** We show the results of our method with different dilation sizes on  
 394 GauGAN in Figure 10. Increasing the dilation brings more computations but also slightly improves the  
 395 image quality. Specifically, the shadow boundary of the added car fades when increasing the dilation.  
 396 We choose dilation 1 as the image quality is almost the same as 20 while delivering the best speed.

397 **Large editing.** In Table 4 and Figure 11, we show the results of large editing ( $\sim 35\%$ ) using our  
 398 method. Specifically, we could achieve at most  $1.7\times$  speedup on DDIM,  $1.5\times$  speedup on PD256  
 399 and  $1.7\times$  speedup on GauGAN without losing visual fidelity. Furthermore, in many practical cases,  
 400 users can decompose a large edit into several small edits. Our method could incrementally update the  
 401 results instantly when the edit is being created.

402 **Sequential editing.** In Figure 12, we show the results of sequential editing with our method.  
 403 Specifically, *One-time Pre-computation* performs as well as the *Full Model*, demonstrating that our  
 404 method can be applied to multiple sequential editing with only one-time pre-computation in most  
 405 cases. Moreover, for extremely large edited regions, we could use SIGE to incrementally update  
 406 the pre-computed features (*Incremental Pre-computation*) and condition the later editing on the  
 407 recomputed one. Its results are also as good as the full model. Therefore, our method could well  
 408 address the sequential editing.

409 **Additional visualization.** In Figure 13, we show additional synthetic editing visual results of  
 410 DDIM [1] and Progressive Distillation [12] on LSUN Church [10]. In Figure 14, we show additional  
 411 synthetic editing visual results of GauGAN on Cityscapes [11].

## 412 E License & Computation Resources

413 Here we show all the licenses of our used assets. The model DDIM [1], Progressive Distillation [12],  
 414 GauGAN [2] and GAN Compression [3] is under MIT license, Apache license, Creative Commons  
 415 license and BSD license, respectively. SDEdit is under MIT license. The license of Cityscapes [11]  
 416 is here. LSUN Church [10] does not have explicit license.

| Model  | Editing Size | Method          | MACs  |       | 3090   |       | 2080Ti |       | Intel Core i9-10920X |       | Apple M1 Pro |       |
|--------|--------------|-----------------|-------|-------|--------|-------|--------|-------|----------------------|-------|--------------|-------|
|        |              |                 | Value | Ratio | Value  | Ratio | Value  | Ratio | Value                | Ratio | Value        | Ratio |
| DDIM   | –            | Original        | 248G  | –     | 37.5ms | –     | 54.6ms | –     | 609ms                | –     | 12.9s        | –     |
|        | 32.9%        | Ours            | 115G  | 2.2×  | 26.0ms | 1.4×  | 36.9ms | 1.5×  | 449ms                | 1.4×  | 7.53s        | 1.7×  |
| PD256  | –            | Original        | 119G  | –     | 35.1ms | –     | 51.2ms | –     | 388ms                | –     | 6.18s        | –     |
|        | 32.9%        | Ours            | 64.3G | 1.9×  | 25.3ms | 1.4×  | 35.1ms | 1.5×  | 334ms                | 1.2×  | 4.47s        | 1.4×  |
| GauGAN | –            | Original        | 281G  | –     | 45.4ms | –     | 49.5ms | –     | 682ms                | –     | 14.1s        | –     |
|        |              | GAN Compression | 31.2G | 9.0×  | 17.0ms | 2.7×  | 25.0ms | 2.0×  | 333ms                | 2.1×  | 2.11s        | 6.7×  |
|        | 38.7%        | Ours            | 148G  | 1.9×  | 27.9ms | 1.6×  | 41.7ms | 1.2×  | 512ms                | 1.3×  | 8.37s        | 1.7×  |
|        |              | GAN Comp.+Ours  | 18.3G | 15×   | 15.3ms | 3.0×  | 22.2ms | 2.2×  | 169ms                | 4.0×  | 1.25s        | 11×   |

Table 4: Measured latency speedup of large editing on different devices. The detailed editing examples are shown in Figure 11. Our method could reduce up to 2.2× MACs, and 1.4×, 1.5×, 1.4× and 1.7× latency on NVIDIA RTX 3090, 2080Ti, Intel Core i9-10920X and M1 Pro. With GAN Compression, we could further speedup GauGAN by 4.0× on Intel Core-i9 and 11× on Apple M1 Pro.

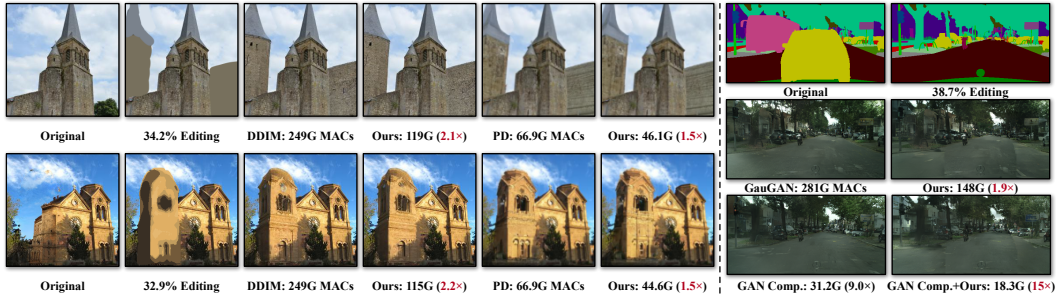

Figure 11: Qualitative results of our method under large editing. Our method could still well preserve the visual fidelity of the original model without losing global context while reducing the computation by 1.5 ~ 1.9×.

417 Since our method does not involve any model training, all our generated results are obtained on a  
418 single NVIDIA RTX 3090, which only takes 1 ~ 2 hours to process all the test images (~ 7, 000 in  
419 total) including both the original models and our method. We measure the model latency on NVIDIA  
420 RTX 3090, 2080Ti, Intel Core i9-10920X CPU, and Apple M1 Pro.

## 421 F Discussion

422 **Limitations.** As discussed in Section 4.2, our method needs some additional memory to store the  
423 original activations, even though this only increases the peak GPU memory usage slightly. It may not  
424 work on some memory-constrained devices, especially for the diffusion models (*e.g.*, DDIM [1] and  
425 Progressive Distillation [12]), since our method requires storing activations of all iteration steps.

426 Our engine has limited speedup on convolution with low resolution. When the input resolution is low,  
427 the sparse block size needs to be even smaller to get a good sparsity, such as 1 or 2. However, such  
428 extremely small block sizes have worse memory locality and will result in low hardware efficiency.

429 Besides, we sometimes observe noticeable boundary between the edited region and unedited region  
430 in our generated samples of GauGAN [2]. This is because, for GauGAN model, the unedited region  
431 will also change slightly when we perform normal inference. However, since our method does not  
432 update the unedited region, there may be some color gaps between the edited and unedited region,  
433 even though the semantic is coherent. Dilating the difference mask would help reduce the gap.

434 **Societal impact.** In this paper, we investigate how to update user editing locally without losing  
435 global coherence to enable smoother interaction with the generative models. In real-world scenarios,  
436 people could use an interactive interface to edit an image, and our method could provide a quick  
437 and high-quality preview for their editing, which eases the process of visual content creation and  
438 saves energy.

439 However, our method can also be utilized by some malicious users to generate fake content, deceive  
440 people, and spread misinformation, which may lead to potential negative social impacts. Following  
441 previous work [9], we will also explicitly specify the usage permission of our engine with proper  
442 licenses.

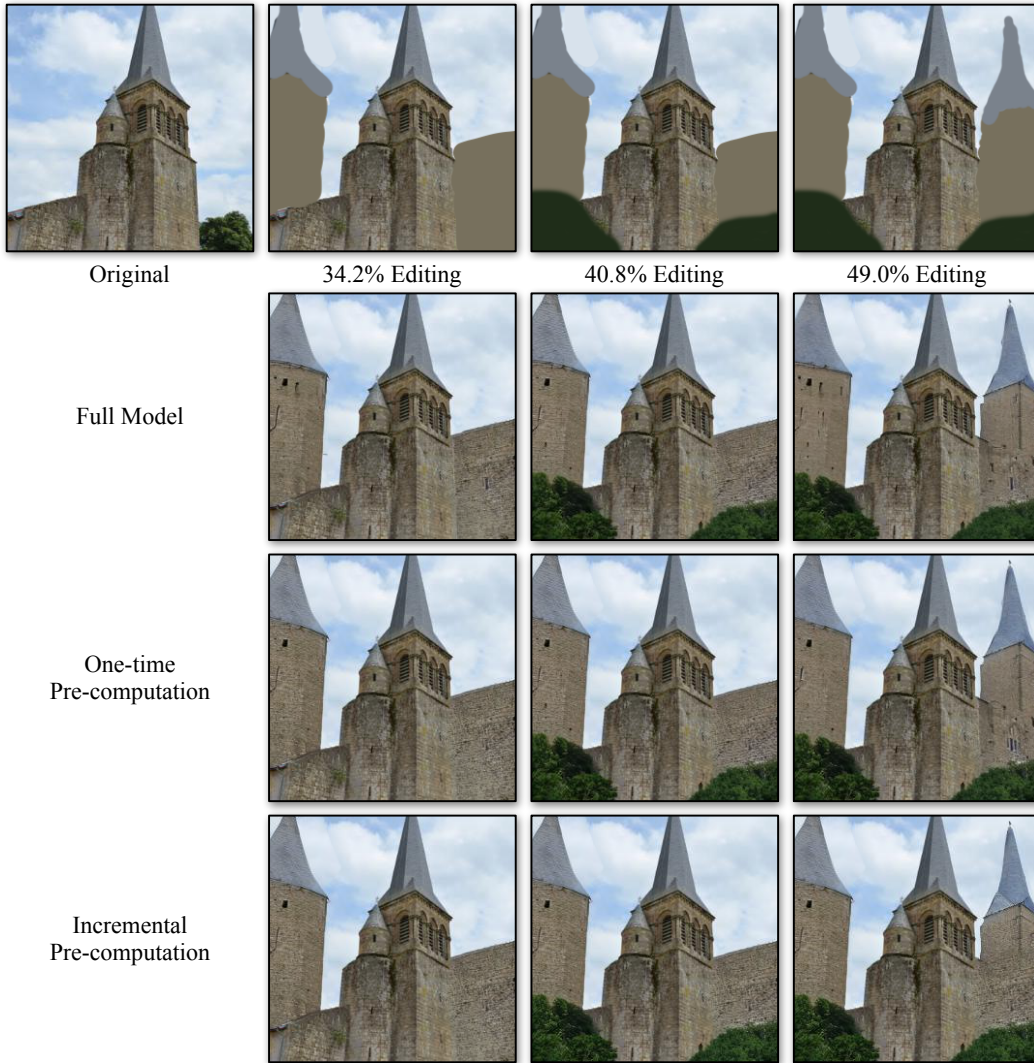

Figure 12: Sequential editing results with SIGE. *Full Model* means the results with the full model. *One-time Pre-computation* means we only pre-compute the original image features for all the editing steps. *Incremental Pre-computation* means we incrementally update the pre-computed features with SIGE before the next editing step. The image quality of all methods are quite similar.

## References

- 443
- 444 [1] Jiaming Song, Chenlin Meng, and Stefano Ermon. Denoising diffusion implicit models. In *ICLR*, 2020. 1,  
445 2, 5, 6, 9, 3, 4
- 446 [2] Taesung Park, Ming-Yu Liu, Ting-Chun Wang, and Jun-Yan Zhu. Semantic image synthesis with spatially-  
447 adaptive normalization. In *CVPR*, 2019. 1, 2, 5, 6, 9, 3, 4, 7
- 448 [3] Muyang Li, Ji Lin, Yaoyao Ding, Zhijian Liu, Jun-Yan Zhu, and Song Han. Gan compression: Efficient  
449 architectures for interactive conditional gans. In *CVPR*, 2020. 1, 2, 3, 6, 7, 9
- 450 [4] Ian Goodfellow, Jean Pouget-Abadie, Mehdi Mirza, Bing Xu, David Warde-Farley, Sherjil Ozair, Aaron  
451 Courville, and Yoshua Bengio. Generative adversarial nets. *NeurIPS*, 2014. 1, 2
- 452 [5] Jascha Sohl-Dickstein, Eric Weiss, Niru Maheswaranathan, and Surya Ganguli. Deep unsupervised learning  
453 using nonequilibrium thermodynamics. In *ICML*, 2015. 1, 2
- 454 [6] Jonathan Ho, Ajay Jain, and Pieter Abbeel. Denoising diffusion probabilistic models. *NeurIPS*, 2020. 1, 2,  
455 6

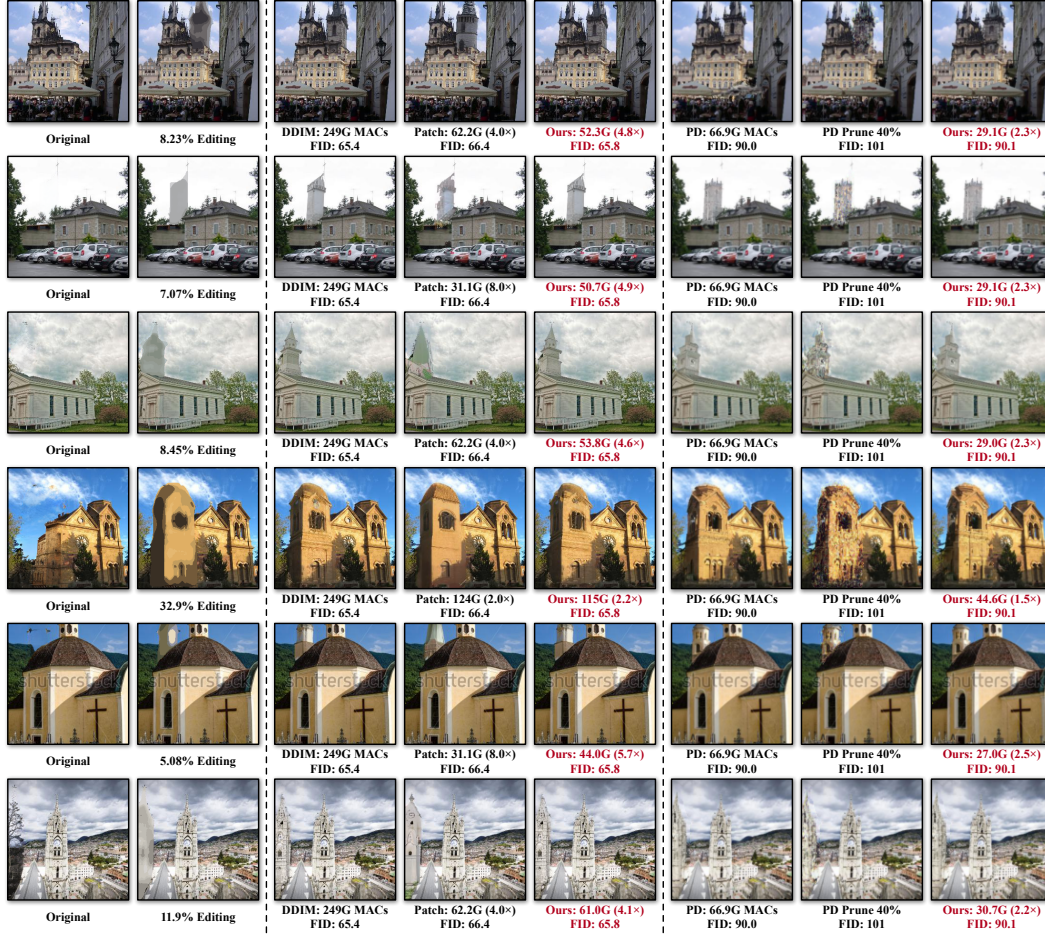

Figure 13: More visualization results on LSUN Church of DDIM [1] and Progressive Distillation. *Prune 40%*: Uniformly pruning 40% weights of the model without fine-tuning. *Patch*: Cropping the smallest image patch that covers all the edited region of the model input and blend the model output back to the original output image. Our method achieves lower FID with less MACs for both DDIM and progressive distillation.

- 456 [7] Phillip Isola, Jun-Yan Zhu, Tinghui Zhou, and Alexei A Efros. Image-to-image translation with conditional  
457 adversarial networks. In *CVPR*, 2017. 2
- 458 [8] Patsorn Sangkloy, Jingwan Lu, Chen Fang, Fisher Yu, and James Hays. Scribbler: Controlling deep image  
459 synthesis with sketch and color. In *CVPR*, 2017. 2
- 460 [9] Chenlin Meng, Yutong He, Yang Song, Jiaming Song, Jiajun Wu, Jun-Yan Zhu, and Stefano Ermon.  
461 SDEdit: Guided image synthesis and editing with stochastic differential equations. In *ICLR*, 2022. 2, 6, 4
- 462 [10] Fisher Yu, Yinda Zhang, Shuran Song, Ari Seff, and Jianxiong Xiao. Lsun: Construction of a large-scale  
463 image dataset using deep learning with humans in the loop. *arXiv preprint arXiv:1506.03365*, 2015. 2, 6, 3
- 464 [11] Marius Cordts, Mohamed Omran, Sebastian Ramos, Timo Rehfeld, Markus Enzweiler, Rodrigo Benenson,  
465 Uwe Franke, Stefan Roth, and Bernt Schiele. The cityscapes dataset for semantic urban scene understanding.  
466 In *CVPR*, 2016. 2, 6, 3
- 467 [12] Tim Salimans and Jonathan Ho. Progressive distillation for fast sampling of diffusion models. In *ICLR*,  
468 2021. 2, 3, 5, 6, 8, 9, 1, 4
- 469 [13] Liang Hou, Zehuan Yuan, Lei Huang, Huawei Shen, Xueqi Cheng, and Changhu Wang. Slimmable  
470 generative adversarial networks. In *AAAI*, 2021. 2, 3
- 471 [14] Yonggan Fu, Wuyang Chen, Haotao Wang, Haoran Li, Yingyan Lin, and Zhangyang Wang. Autogan-  
472 distiller: Searching to compress generative adversarial networks. In *ICML*, 2020. 2, 3

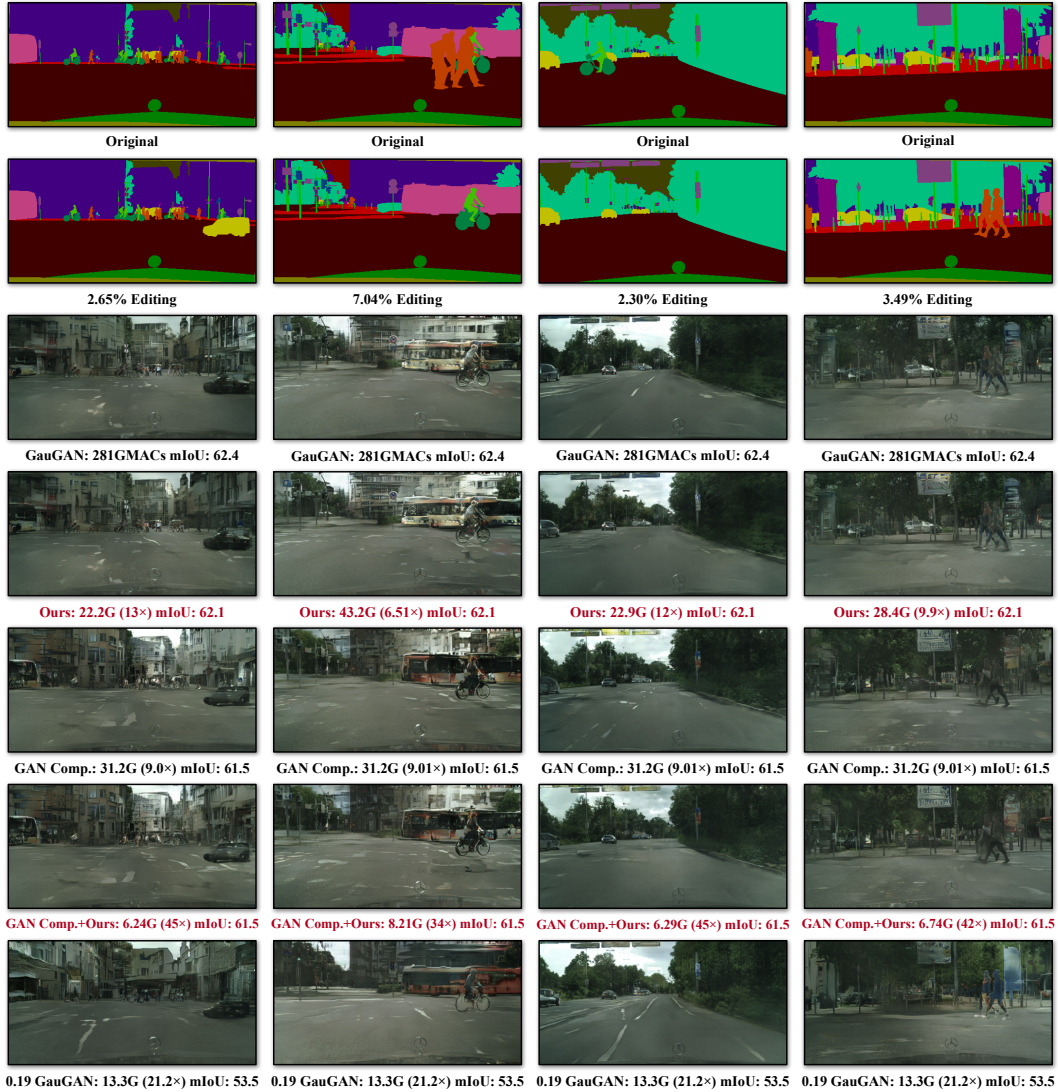

Figure 14: More visualization results on Cityscapes of GauGAN [2]. *0.19 GauGAN*: Uniformly reducing each layer of GauGAN to 19% channels and training from scratch. Our method could achieve higher mIoU than GAN Compression with less MACs. When applying to GAN Compression, our method achieves 34 ~ 45× MACs reduction with minor mIoU drop.

- 473 [15] Shaojie Li, Mingbao Lin, Yan Wang, Chao Fei, Ling Shao, and Rongrong Ji. Learning efficient gans for  
474 image translation via differentiable masks and co-attention distillation. *IEEE Transactions on Multimedia*,  
475 2022. 2, 3
- 476 [16] Qing Jin, Jian Ren, Oliver J Woodford, Jiazhuo Wang, Geng Yuan, Yanzhi Wang, and Sergey Tulyakov.  
477 Teachers do more than teach: Compressing image-to-image models. In *CVPR*, 2021. 2, 3
- 478 [17] Tamar Rott Shaham, Michaël Gharbi, Richard Zhang, Eli Shechtman, and Tomer Michaeli. Spatially-  
479 adaptive pixelwise networks for fast image translation. In *CVPR*, 2021. 2, 3
- 480 [18] Haotao Wang, Shupeng Gui, Haichuan Yang, Ji Liu, and Zhangyang Wang. Gan slimming: All-in-one gan  
481 compression by a unified optimization framework. In *ECCV*, 2020. 2, 3
- 482 [19] Tero Karras, Samuli Laine, and Timo Aila. A style-based generator architecture for generative adversarial  
483 networks. In *CVPR*, 2019. 2
- 484 [20] Tero Karras, Samuli Laine, Miika Aittala, Janne Hellsten, Jaakko Lehtinen, and Timo Aila. Analyzing and  
485 improving the image quality of stylegan. In *CVPR*, 2020. 2

- 486 [21] Andrew Brock, Jeff Donahue, and Karen Simonyan. Large scale gan training for high fidelity natural  
487 image synthesis. In *ICLR*, 2019. 2
- 488 [22] Prafulla Dhariwal and Alexander Nichol. Diffusion models beat gans on image synthesis. *Advances in*  
489 *Neural Information Processing Systems*, 34, 2021. 2
- 490 [23] Patrick Esser, Robin Rombach, and Bjorn Ommer. Taming transformers for high-resolution image synthesis.  
491 In *CVPR*, 2021. 2
- 492 [24] Ali Razavi, Aaron Van den Oord, and Oriol Vinyals. Generating diverse high-fidelity images with vq-vae-2.  
493 In *NeurIPS*, volume 32, 2019. 2
- 494 [25] Chitwan Saharia, William Chan, Huiwen Chang, Chris A Lee, Jonathan Ho, Tim Salimans, David J Fleet,  
495 and Mohammad Norouzi. Palette: Image-to-image diffusion models. *arXiv preprint arXiv:2111.05826*,  
496 2021. 2
- 497 [26] Jun-Yan Zhu, Taesung Park, Phillip Isola, and Alexei A Efros. Unpaired image-to-image translation using  
498 cycle-consistent adversarial networks. In *ICCV*, 2017. 2
- 499 [27] Peihao Zhu, Rameen Abdal, Yipeng Qin, and Peter Wonka. Sean: Image synthesis with semantic region-  
500 adaptive normalization. In *CVPR*, 2020. 2
- 501 [28] Alex Nichol, Prafulla Dhariwal, Aditya Ramesh, Pranav Shyam, Pamela Mishkin, Bob McGrew, Ilya  
502 Sutskever, and Mark Chen. Glide: Towards photorealistic image generation and editing with text-guided  
503 diffusion models. *arXiv preprint arXiv:2112.10741*, 2021. 2
- 504 [29] Jooyoung Choi, Sungwon Kim, Yonghyun Jeong, Youngjune Gwon, and Sungroh Yoon. Ilvr: Conditioning  
505 method for denoising diffusion probabilistic models. *arXiv preprint arXiv:2108.02938*, 2021. 2
- 506 [30] Gwanghyun Kim and Jong Chul Ye. Diffusionclip: Text-guided image manipulation using diffusion  
507 models. *arXiv preprint arXiv:2110.02711*, 2021. 2
- 508 [31] Jun-Yan Zhu, Philipp Krähenbühl, Eli Shechtman, and Alexei A Efros. Generative visual manipulation on  
509 the natural image manifold. In *ECCV*, 2016. 2
- 510 [32] Or Patashnik, Zongze Wu, Eli Shechtman, Daniel Cohen-Or, and Dani Lischinski. Styleclip: Text-driven  
511 manipulation of stylegan imagery. In *ICCV*, 2021. 2
- 512 [33] Rameen Abdal, Yipeng Qin, and Peter Wonka. Image2stylegan: How to embed images into the stylegan  
513 latent space? In *ICCV*, 2019. 2
- 514 [34] Rameen Abdal, Yipeng Qin, and Peter Wonka. Image2stylegan++: How to edit the embedded images? In  
515 *CVPR*, pages 8296–8305, 2020. 2
- 516 [35] Andrew Howard, Mark Sandler, Grace Chu, Liang-Chieh Chen, Bo Chen, Mingxing Tan, Weijun Wang,  
517 Yukun Zhu, Ruoming Pang, Vijay Vasudevan, et al. Searching for mobilenetv3. In *ICCV*, 2019. 2
- 518 [36] Andrew G Howard, Menglong Zhu, Bo Chen, Dmitry Kalenichenko, Weijun Wang, Tobias Weyand, Marco  
519 Andreetto, and Hartwig Adam. Mobilenets: Efficient convolutional neural networks for mobile vision  
520 applications. *arXiv preprint arXiv:1704.04861*, 2017. 2
- 521 [37] Mark Sandler, Andrew Howard, Menglong Zhu, Andrey Zhmoginov, and Liang-Chieh Chen. Mobilenetv2:  
522 Inverted residuals and linear bottlenecks. In *Proceedings of the IEEE conference on computer vision and*  
523 *pattern recognition*, 2018. 2
- 524 [38] Yang Song, Jascha Sohl-Dickstein, Diederik P Kingma, Abhishek Kumar, Stefano Ermon, and Ben  
525 Poole. Score-based generative modeling through stochastic differential equations. *arXiv preprint*  
526 *arXiv:2011.13456*, 2020. 2, 6
- 527 [39] Zhifeng Kong and Wei Ping. On fast sampling of diffusion probabilistic models. *arXiv preprint*  
528 *arXiv:2106.00132*, 2021. 2
- 529 [40] Zhisheng Xiao, Karsten Kreis, and Arash Vahdat. Tackling the generative learning trilemma with denoising  
530 diffusion GANs. In *ICLR*, 2022. 3
- 531 [41] Song Han, Huizi Mao, and William J Dally. Deep Compression: Compressing Deep Neural Networks with  
532 Pruning, Trained Quantization and Huffman Coding. In *ICLR*, 2016. 3
- 533 [42] Yihui He, Ji Lin, Zhijian Liu, Hanrui Wang, Li-Jia Li, and Song Han. AMC: AutoML for Model  
534 Compression and Acceleration on Mobile Devices. In *ECCV*, 2018. 3



- 535 [43] Ji Lin, Yongming Rao, Jiwen Lu, and Jie Zhou. Runtime neural pruning. In *NeurIPS*, 2017. 3
- 536 [44] Yihui He, Xiangyu Zhang, and Jian Sun. Channel pruning for accelerating very deep neural networks. In  
537 *ICCV*, 2017. 3
- 538 [45] Zhuang Liu, Jianguo Li, Zhiqiang Shen, Gao Huang, Shoumeng Yan, and Changshui Zhang. Learning  
539 efficient convolutional networks through network slimming. In *ICCV*, 2017. 3
- 540 [46] Zechun Liu, Haoyuan Mu, Xiangyu Zhang, Zichao Guo, Xin Yang, Kwang-Ting Cheng, and Jian Sun.  
541 MetaPruning: Meta Learning for Automatic Neural Network Channel Pruning. In *ICCV*, 2019. 3
- 542 [47] Shuchang Zhou, Yuxin Wu, Zekun Ni, Xinyu Zhou, He Wen, and Yuheng Zou. Dorefa-net: Training low  
543 bitwidth convolutional neural networks with low bitwidth gradients. *arXiv preprint arXiv:1606.06160*,  
544 2016. 3
- 545 [48] Mohammad Rastegari, Vicente Ordonez, Joseph Redmon, and Ali Farhadi. Xnor-net: Imagenet classifica-  
546 tion using binary convolutional neural networks. In *ECCV*, 2016. 3
- 547 [49] Kuan Wang, Zhijian Liu, Yujun Lin, Ji Lin, and Song Han. HAQ: Hardware-Aware Automated Quantization  
548 with Mixed Precision. In *CVPR*. 3
- 549 [50] Jungwook Choi, Zhuo Wang, Swagath Venkataramani, Pierce I-Jen Chuang, Vijayalakshmi Srinivasan,  
550 and Kailash Gopalakrishnan. Pact: Parameterized clipping activation for quantized neural networks. *arXiv*  
551 *preprint arXiv:1805.06085*, 2018. 3
- 552 [51] Benoit Jacob, Skirmantas Kligys, Bo Chen, Menglong Zhu, Matthew Tang, Andrew Howard, Hartwig  
553 Adam, and Dmitry Kalenichenko. Quantization and training of neural networks for efficient integer-  
554 arithmetic-only inference. In *CVPR*, pages 2704–2713, 2018. 3
- 555 [52] Barret Zoph and Quoc V Le. Neural Architecture Search with Reinforcement Learning. In *ICLR*, 2017. 3
- 556 [53] Barret Zoph, Vijay Vasudevan, Jonathon Shlens, and Quoc V. Le. Learning Transferable Architectures for  
557 Scalable Image Recognition. In *CVPR*, 2018. 3
- 558 [54] Haoxiao Liu, Karen Simonyan, and Yiming Yang. DARTS: Differentiable Architecture Search. In *ICLR*,  
559 2019. 3
- 560 [55] Han Cai, Ligeng Zhu, and Song Han. ProxylessNAS: Direct Neural Architecture Search on Target Task  
561 and Hardware. In *ICLR*, 2019. 3
- 562 [56] Mingxing Tan, Bo Chen, Ruoming Pang, Vijay Vasudevan, Mark Sandler, Andrew Howard, and Quoc V  
563 Le. MnasNet: Platform-Aware Neural Architecture Search for Mobile. In *CVPR*, 2019. 3
- 564 [57] Bichen Wu, Xiaoliang Dai, Peizhao Zhang, Yanghan Wang, Fei Sun, Yiming Wu, Yuandong Tian,  
565 Peter Vajda, Yangqing Jia, and Kurt Keutzer. FBNet: Hardware-Aware Efficient ConvNet Design via  
566 Differentiable Neural Architecture Search. In *CVPR*, 2019. 3
- 567 [58] Ji Lin, Wei-Ming Chen, Yujun Lin, John Cohn, Chuang Gan, and Song Han. Mccnet: Tiny deep learning  
568 on iot devices. In *NeurIPS*, 2020. 3
- 569 [59] Ji Lin, Richard Zhang, Frieder Ganz, Song Han, and Jun-Yan Zhu. Anycost gans for interactive image  
570 synthesis and editing. In *CVPR*, 2021. 3
- 571 [60] Han Shu, Yunhe Wang, Xu Jia, Kai Han, Hanting Chen, Chunjing Xu, Qi Tian, and Chang Xu. Co-  
572 evolutionary compression for unpaired image translation. In *ICCV*, 2019. 3
- 573 [61] Yuchen Liu, Zhixin Shu, Yijun Li, Zhe Lin, Federico Perazzi, and Sun-Yuan Kung. Content-aware gan  
574 compression. In *CVPR*, 2021. 3
- 575 [62] Ruixin Ma and Junying Lou. Cpgan: An efficient architecture designing for text-to-image generative  
576 adversarial networks based on canonical polyadic decomposition. *Scientific Programming*, 2021. 3
- 577 [63] Angeline Aguineldo, Ping-Yeh Chiang, Alex Gain, Ameya Patil, Kolten Pearson, and Soheil Feizi.  
578 Compressing gans using knowledge distillation. *arXiv preprint arXiv:1902.00159*, 2019. 3
- 579 [64] Song Han, Jeff Pool, John Tran, and William Dally. Learning both weights and connections for efficient  
580 neural network. *NeurIPS*, 2015. 3
- 581 [65] Hao Li, Asim Kadav, Igor Durdanovic, Hanan Samet, and Hans Peter Graf. Pruning filters for efficient  
582 convnets. *ICLR*, 2016. 3

- 583 [66] Baoyuan Liu, Min Wang, Hassan Foroosh, Marshall Tappen, and Marianna Pensky. Sparse convolutional  
584 neural networks. In *CVPR*, 2015. 3
- 585 [67] Max Jaderberg, Andrea Vedaldi, and Andrew Zisserman. Speeding up convolutional neural networks with  
586 low rank expansions. In *BMVC*, 2014. 3
- 587 [68] Haotian Tang, Zhijian Liu, Xiuyu Li, Yujun Lin, and Song Han. Torchsparse: Efficient point cloud  
588 inference engine. In *MLSys*, 2022. 3
- 589 [69] Gernot Riegler, Ali Osman Ulusoy, and Andreas Geiger. Octnet: Learning deep 3d representations at high  
590 resolutions. In *CVPR*, 2017. 3
- 591 [70] Mengye Ren, Andrei Pokrovsky, Bin Yang, and Raquel Urtasun. Sbnnet: Sparse blocks network for fast  
592 inference. In *CVPR*, 2018. 3, 5
- 593 [71] Patrick Judd, Alberto Delmas, Sayeh Sharify, and Andreas Moshovos. Cnvlutin2: Ineffectual-activation-  
594 and-weight-free deep neural network computing. *arXiv preprint arXiv:1705.00125*, 2017. 3
- 595 [72] Shaohuai Shi and Xiaowen Chu. Speeding up convolutional neural networks by exploiting the sparsity of  
596 rectifier units. *arXiv preprint arXiv:1704.07724*, 2017. 3
- 597 [73] Xuanyi Dong, Junshi Huang, Yi Yang, and Shuicheng Yan. More is less: A more complicated network  
598 with less inference complexity. In *CVPR*, 2017. 3
- 599 [74] Bowen Pan, Wuwei Lin, Xiaolin Fang, Chaoqin Huang, Bolei Zhou, and Cewu Lu. Recurrent residual  
600 module for fast inference in videos. In *CVPR*, 2018. 3
- 601 [75] Xiaoxiao Li, Ziwei Liu, Ping Luo, Chen Change Loy, and Xiaoou Tang. Not all pixels are equal: Difficulty-  
602 aware semantic segmentation via deep layer cascade. In *CVPR*, 2017. 3
- 603 [76] Thomas Verelst and Tinne Tuytelaars. Dynamic convolutions: Exploiting spatial sparsity for faster  
604 inference. In *CVPR*, 2020. 3
- 605 [77] Longguang Wang, Xiaoyu Dong, Yingqian Wang, Xinyi Ying, Zaiping Lin, Wei An, and Yulan Guo.  
606 Exploring sparsity in image super-resolution for efficient inference. In *CVPR*, 2021. 3
- 607 [78] Yizeng Han, Gao Huang, Shiji Song, Le Yang, Yitian Zhang, and Haojun Jiang. Spatially adaptive feature  
608 refinement for efficient inference. *TIP*, 2021. 3
- 609 [79] Yulin Wang, Yang Yue, Yuanze Lin, Haojun Jiang, Zihang Lai, Victor Kulikov, Nikita Orlov, Humphrey  
610 Shi, and Gao Huang. Adafocus v2: End-to-end training of spatial dynamic networks for video recognition.  
611 *arXiv preprint arXiv:2112.14238*, 2021. 3
- 612 [80] Mathias Parger, Chengcheng Tang, Christopher D Twigg, Cem Keskin, Robert Wang, and Markus Stein-  
613 berger. Deltacnn: End-to-end cnn inference of sparse frame differences in videos. *arXiv preprint*  
614 *arXiv:2203.03996*, 2022. 3
- 615 [81] Sergey Ioffe and Christian Szegedy. Batch normalization: Accelerating deep network training by reducing  
616 internal covariate shift. In *ICML*, 2015. 5
- 617 [82] Dmitry Ulyanov, Andrea Vedaldi, and Victor Lempitsky. Instance normalization: The missing ingredient  
618 for fast stylization. *arXiv preprint arXiv:1607.08022*, 2016. 5, 1
- 619 [83] Xun Huang and Serge Belongie. Arbitrary style transfer in real-time with adaptive instance normalization.  
620 In *ICCV*, 2017. 5
- 621 [84] Yuxin Wu and Kaiming He. Group normalization. In *ECCV*, 2018. 5, 1
- 622 [85] Alexander Quinn Nichol and Prafulla Dhariwal. Improved denoising diffusion probabilistic models. In  
623 *ICML*, pages 8162–8171, 2021. 5
- 624 [86] Yaoyao Ding, Ligeng Zhu, Zhihao Jia, Gennady Pekhimenko, and Song Han. Ios: Inter-operator scheduler  
625 for cnn acceleration. *MLSys*, 2021. 5
- 626 [87] Zhihao Jia, Oded Padon, James Thomas, Todd Warszawski, Matei Zaharia, and Alex Aiken. Taso:  
627 optimizing deep learning computation with automatic generation of graph substitutions. In *SOSP*, 2019. 5
- 628 [88] Kaiming He, Xiangyu Zhang, Shaoqing Ren, and Jian Sun. Deep residual learning for image recognition.  
629 In *CVPR*, 2016. 5, 1

- 630 [89] Geoffrey Hinton, Oriol Vinyals, Jeff Dean, et al. Distilling the knowledge in a neural network. *arXiv*  
631 *preprint arXiv:1503.02531*, 2(7), 2015. 5
- 632 [90] Xingyi Zhou, Rohit Girdhar, Armand Joulin, Philipp Krähenbühl, and Ishan Misra. Detecting twenty-  
633 thousand classes using image-level supervision. In *arXiv preprint arXiv:2201.02605*, 2021. 6
- 634 [91] Shengyu Zhao, Jonathan Cui, Yilun Sheng, Yue Dong, Xiao Liang, Eric I Chang, and Yan Xu. Large scale  
635 image completion via co-modulated generative adversarial networks. In *ICLR*, 2021. 6
- 636 [92] Richard Zhang, Phillip Isola, Alexei A Efros, Eli Shechtman, and Oliver Wang. The unreasonable  
637 effectiveness of deep features as a perceptual metric. In *CVPR*, 2018. 6
- 638 [93] Martin Heusel, Hubert Ramsauer, Thomas Unterthiner, Bernhard Nessler, and Sepp Hochreiter. Gans  
639 trained by a two time-scale update rule converge to a local nash equilibrium. *NeurIPS*, 2017. 6
- 640 [94] Gaurav Parmar, Richard Zhang, and Jun-Yan Zhu. On aliased resizing and surprising subtleties in gan  
641 evaluation. In *CVPR*, 2022. 6
- 642 [95] Fisher Yu, Vladlen Koltun, and Thomas Funkhouser. Dilated residual networks. In *CVPR*, pages 472–480,  
643 2017. 6
